# Supplementary material for: Microstructure and chemical composition of Roman orichalcum coins emitted after the monetary reform of Augustus (23 B.C.)
Source: PubMed Central journal article supplement (PMC6722059; doi:10.1038/s41598-019-48941-4), 2019-09-03
Supplement: 41598_2019_48941_MOESM1_ESM.pdf [file 41598_2019_48941_MOESM1_ESM.pdf]

# Microstructure and chemical composition of Roman orichalcum coins emitted after the monetary reform of *Augustus* (23 B.C.)

Melania Di Fazio<sup>a</sup>, Anna Candida Felici<sup>b</sup>, Fiorenzo Catalli<sup>c</sup> and Caterina De Vito<sup>a\*</sup>

<sup>a</sup>Department of Earth Sciences, Sapienza University of Rome, P. le Aldo Moro 5, Rome, Italy

<sup>b</sup>Department of Basic and Applied Sciences for Engineering, Sapienza University of Rome, Italy

<sup>c</sup>Via Attilio Friggeri 95, 00136, Rome, Italy.

Corresponding author: [caterina.devito@uniroma1.it](mailto:caterina.devito@uniroma1.it)

## Supplementary information

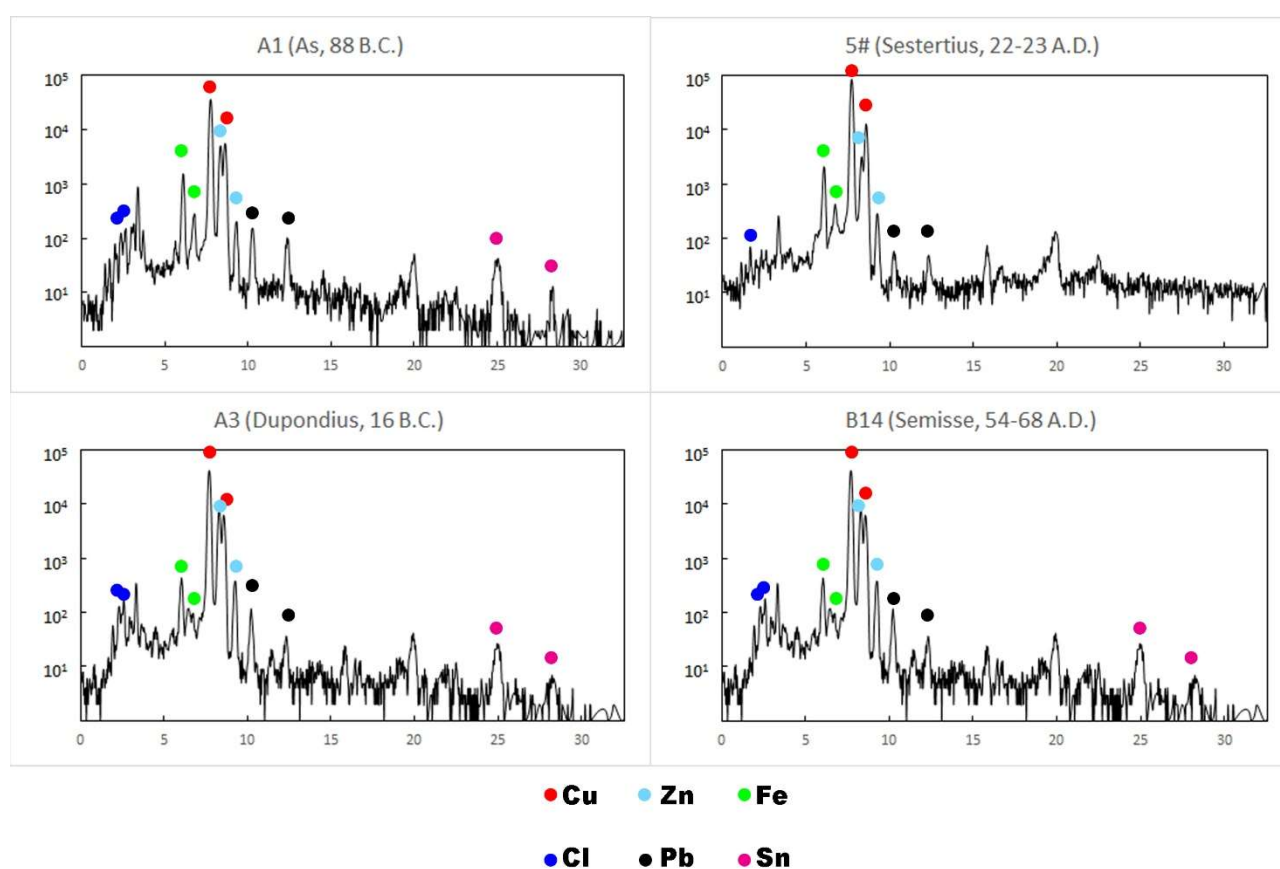

Figure 1S: XRF spectra of samples A1, A3, 5# and B14.
